# Supplementary material
Source: PubMed Central journal article supplement (PMC1297689)
Supplement: pnas_0508809102_5.pdf [file pnas_0508809102_5.pdf]

|               |                                                                |        |
|---------------|----------------------------------------------------------------|--------|
| Query: 16     | atgctgccttagcagggttttattaatatgcttttgggtcaaattcacactaatctgttta  | 75     |
| Sbjct: 550927 | atgctgccttagcagggttttattaatatgcttttgggtcaaattcacactaatctgttta  | 550868 |
| Query: 76     | tggataaatatattcgctaatccaccacaaaataagttgggtcaaatttattgaaaagtact | 135    |
| Sbjct: 550867 | tggataaatatattcgctaatccaccacaaaataagttgggtcaaatttattgaaaagtact | 550808 |
| Query: 136    | cataattagaaaaatccaattacagtatgaatgctaaaaaactaattaataatttcgat    | 195    |
| Sbjct: 550807 | cataattagaaaaatccaattacagtatgaatgctaaaaaactaattaataatttcgat    | 550748 |
| Query: 196    | tattaaacaactaattatattgttataaaaaatatttgaattaattcaattaaaaatggta  | 255    |
| Sbjct: 550747 | tattaaacaactaattatattgttataaaaaatatttgaattaattcaattaaaaatggta  | 550688 |
| Query: 256    | aatctctcctcccaaatgaaagtgacaaaaactattggaattccttaaaaaataacaaaa   | 315    |
| Sbjct: 550687 | aatctctcctcccaaatgaaagtgacaaaaactattggaattccttaaaaaataacaaaa   | 550628 |
| Query: 316    | ntttgttaatagtggaaactacattaatctacttatatgaaattaaaaaagaattaaccga  | 375    |
| Sbjct: 550627 | atattgttaatagtggaaactacattaatctacttatatgaaattaaaaaagaattaaccga | 550568 |
| Query: 376    | taaaaatataggttaatttgagaagaacatattgaacagattaataaacaaaaacataat   | 435    |
| Sbjct: 550567 | taaaaatataggttaatttgagaagaacatattgaacagattaataaacaaaaacataat   | 550508 |
| Query: 436    | tcaaatttaagttttgctattgtgaaatgacaaaacaactatttcatcattaattctgaaa  | 495    |
| Sbjct: 550507 | tcaaatttaagttttgctattgtgaaatgacaaaacaactatttcatcattaattctgaaa  | 550448 |
| Query: 496    | acaagtttaacgccttaaaaataatatgctaaacaacagaaaataattaagactttgttag  | 555    |
| Sbjct: 550447 | acaagtttaacgccttaaaaataatatgctaaacaacagaaaataattaagactttgttag  | 550388 |
| Query: 556    | atataaagataagaacttatttatctaaaaaataatgagtttgcagatgacatgcaaaa    | 615    |
| Sbjct: 550387 | atataaagataagaacttatttatctaaaaaataatgagtttgcagatgacatgcaaaa    | 550328 |

Query: 616 tgaaaatcgggccttattggatgattaaattattaactagacgaataaaaaatagcctg 675  
|||||  
Sbjct: 550327 tgaaaatcgggccttattggatgattaaattattaactagacgaataaaaaatag-ctg 550269

Query: 676 attanntattcnttagcctggatnaaatag-acnttnaaaagttataatnagccgcntt 734  
|||| |  
Sbjct: 550268 attaagttattcttaagcatagataaaaatagaactttaaaaagttataattagccgcttt 550209

Query: 735 tttaag-aaaaaatcatnggtcaaataaagattgatgcgaatgg 777  
|||| |  
Sbjct: 550208 attaagaaaaaatcattggtcaaataaagattgatgcggatgg 550165
