# Supplementary material
Source: PubMed Central journal article supplement (PMC1297689)
Supplement: pnas_0508809102_8.pdf [file pnas_0508809102_8.pdf]

## Supporting Text: Polymerase Error Rates and the Accuracy of $\phi$ 29 Cloning

A problem in estimating the sequence accuracy of DNA cloned by  $\phi$ 29 polymerase rolling-circle amplification (RCA) is that there are not good measurements of the overall error rate for the enzyme. The work of Esteban *et al.* (1) on the fidelity of the enzyme is the most often quoted. However, that paper measures the misinsertion rate for incorrect nucleotides using an exonuclease-deficient mutant. Therefore the proofreading activity of the  $\phi$ 29 polymerase 3' exonuclease is deliberately not included in these measurements. This appears to be ignored in later work (2) that cites Esteban *et al.* as reporting an error rate of  $5 \times 10^{-6}$ . Also, this later work calculates the error rate (*ER*) as

$$ER = mf / (bp \times d),$$

where *mf* is the mutation frequency, *bp* is the size of the mutational target in base pairs, and *d* is the number of template doublings. Using this equation the error rate was estimated at  $3 \times 10^{-6}$ . But, because the  $\phi$ 29 RCA reaction is not a doubling process, this analysis is inappropriate.

We believe that the true error rate for  $\phi$ 29 polymerase must be  $\sim 1 \times 10^{-6}$  or lower, as it is for other replicative DNA polymerases with proofreading (1, 3). We have made a number of simplified models of the RCA reaction. For example, consider a four-stage reaction in which 1,000 copies are made from the original input molecule. Three consecutive rounds that each gives 100-fold amplification, yielding a total amplification of  $10^9$ -fold, follow this initial stage. Assuming an error rate of  $1 \times 10^{-6}$  and a 5-kb circular DNA we get:

| Step | Copies | Total bp           | New Errors      | Propagated Errors | Total Errors      | fraction mutant |
|------|--------|--------------------|-----------------|-------------------|-------------------|-----------------|
| 0    | 1      | $5 \times 10^3$    | 0               | 0                 | 0                 | 0%              |
| 1    | $10^3$ | $5 \times 10^6$    | 5               | 0                 | 5                 | 0.5%            |
| 2    | $10^5$ | $5 \times 10^8$    | 500             | 500               | 1000              | 1%              |
| 3    | $10^7$ | $5 \times 10^{10}$ | $5 \times 10^4$ | $1 \times 10^5$   | $1.5 \times 10^5$ | 1.5%            |
| 4    | $10^9$ | $5 \times 10^{12}$ | $5 \times 10^6$ | $1.5 \times 10^7$ | $2 \times 10^7$   | 2%              |

By this type of reasoning, we predict that the majority of the molecules resulting from  $10^9$ -fold amplification by the  $\phi$ 29 RCA reaction will be identical to the starting molecule even if the error rate is as high as  $10^{-5}$  and the amplification in secondary rounds is as low as 10-fold.

1. Esteban, J. A., Salas, M. & Blanco, L. (1993) *J. Biol. Chem.* **268**, 2719–2726.
2. Nelson, J. R., Cai, Y. C., Giesler, T. L., Farchaus, J. W., Sundaram, S. T., Ortiz-Rivera, M., Hosta, L. P., Hewitt, P. L., Mamone, J. A., Palaniappan, C. & Fuller, C. W. (2002) *BioTechniques* **32**, Suppl., 44–47.
3. Kunkel, T. A. (2004) *J. Biol. Chem.* **279**, 16895–16898.
