# Supplementary material
Source: PubMed Central journal article supplement (PMC1297689)

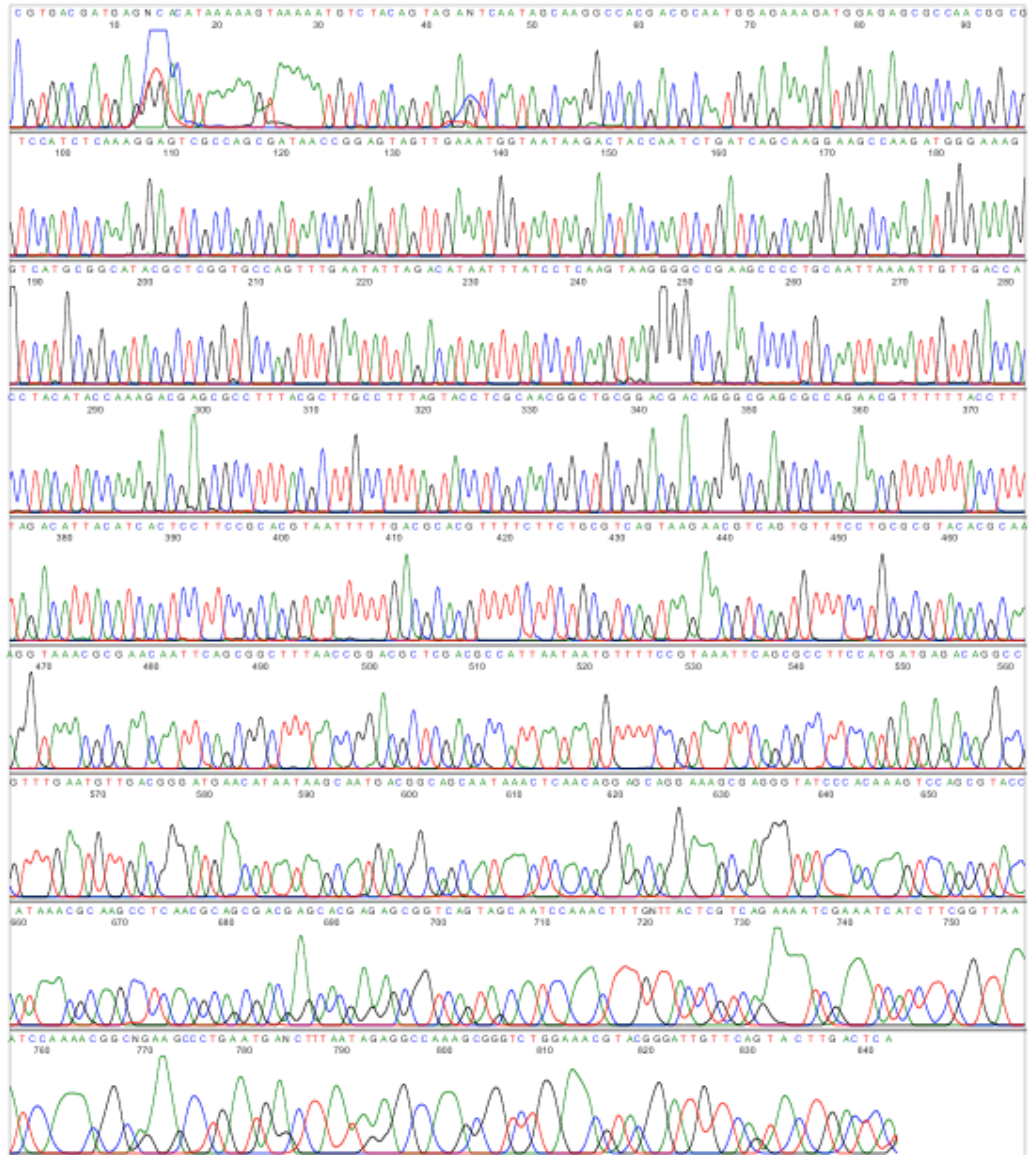

Supplement: pnas_0508809102_1.pdf [file pnas_0508809102_1.pdf]

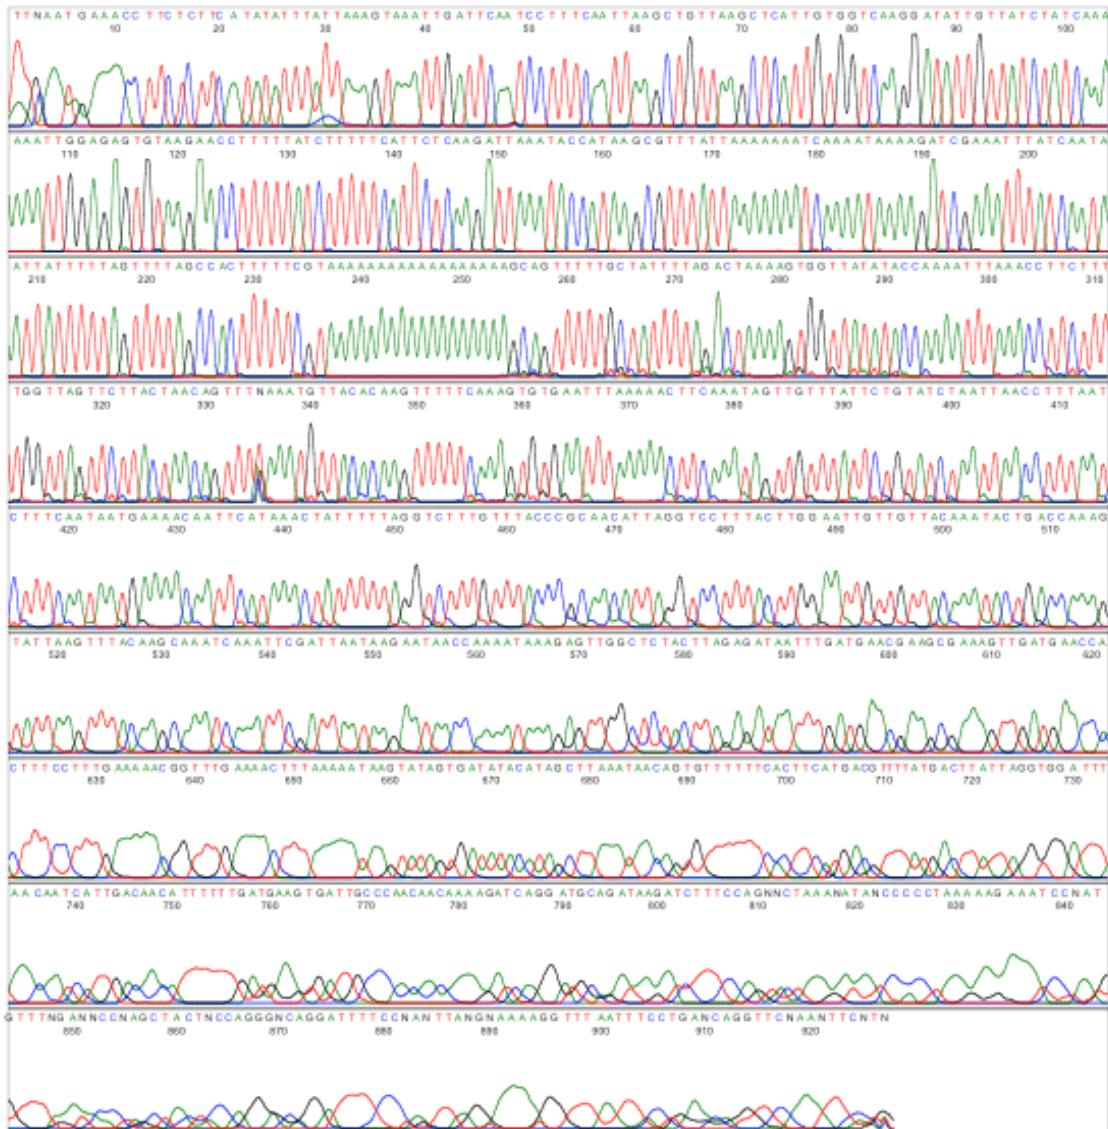

Supplement: pnas_0508809102_6.pdf [file pnas_0508809102_6.pdf]
